# Supplementary material for: Revealing the mass transfer of proton donors for tailoring hydrogen evolution coupled with manganese electrodeposition
Source: Royal Society of Chemistry journal article supplement (doi:10.1039/d4ta02089h), 2024-01-01
Supplement: d4ta02089h1.pdf [file d4ta02089h1.pdf]

## Supplementary material

Revealing the mass transfer of proton donors for tailoring hydrogen  
evolution coupled with manganese electrodeposition

Cai Tan<sup>a</sup>, Chaoyi Chen<sup>a,b\*</sup>, Fan Yang<sup>a,b\*</sup>, Junqi Li<sup>a</sup>, Liangxing Jiang<sup>c</sup>, Changping Shi<sup>a</sup>,  
Jiangyuan Yang<sup>a</sup>, Yuanyu Chen<sup>a</sup>, Lu Yu<sup>a</sup>,

<sup>a</sup>College of Materials and Metallurgy, Guizhou University, Guiyang, Guizhou, 550025,  
China

<sup>b</sup>Guizhou Province Dual Carbon and New Energy Technology Innovation and  
Development Research Institute, Guiyang 550025, China

<sup>c</sup>School of Metallurgy and Environment, Central South University, Changsha, Hunan  
410083, China

---

\* Corresponding author

E-mail address: [ccy197715@126.com](mailto:ccy197715@126.com); [fyang7@gzu.edu.cn](mailto:fyang7@gzu.edu.cn)

|    |                                   |    |
|----|-----------------------------------|----|
| 1  | This file includes:               |    |
| 2  | Supplementary Notes 1 to 7        |    |
| 3  | Supplementary Figures 1 to 10     |    |
| 4  | Supplementary Tables 1 to 6       |    |
| 5  | Supplementary References 1 to 5   |    |
| 6  |                                   |    |
| 7  | Table of Contents                 |    |
| 8  | Supplementary material.....       | 1  |
| 9  | 1. Supplementary Notes .....      | 3  |
| 10 | 2. Supplementary figures.....     | 10 |
| 11 | 3. Supplementary tables .....     | 16 |
| 12 | 4. Supplementary References ..... | 21 |
| 13 |                                   |    |
| 14 |                                   |    |
| 15 |                                   |    |
| 16 |                                   |    |

## 1 **1. Supplementary Notes**

### 2 **In-situ Raman spectroelectrochemical investigation**

3 *In situ* Raman spectra were recorded on a LabRAM HR Evolution (HORIBA Scientific)  
4 spectrometer with a He-Ne laser (wavelength  $\lambda=532$  nm), 50 $\times$  objective, and 600 lines  
5  $\text{mm}^{-1}$  grating. The 50% laser intensity for 120s with two sweeps per spectrum was used  
6 to attenuate the absorption of the Raman signal by the liquid and obtain a good signal-  
7 noise ratio (SNR). A Pt wire and a saturated Hg/Hg<sub>2</sub>O electrode (saturated M KCl as  
8 inner filling electrolyte) were applied as the counter electrode and the reference  
9 electrode, respectively. The electrochemical conditions were maintained by applying a  
10 constant potential of 0~2.0 V using an electrochemistry workstation.

## 1 The cathode current efficiency and DC power consumption

2 Galvanostatic electrowinning was carried out at a current density of  $400 \cdot \text{A} \cdot \text{m}^{-2}$   
3 (maintained for 1 hour at a temperature of  $30^\circ \text{C}$ ). The electrolyte was composed of 20  
4 g/L  $\text{MnSO}_4 \cdot \text{H}_2\text{O}$  and 130 g/L  $(\text{NH}_4)_2\text{SO}_4$  (the results are shown in Figure 1e). After the  
5 end of electrolysis, the cathode is placed in a vacuum drying tank and dried at  $60^\circ \text{C}$   
6 for 12 h. After the electrode is cooled to room temperature, the change of cathode mass  
7 ( $\Delta m$ ) is measured, and the cathode current efficiency (CE) and DC power consumption  
8 (EC) are calculated according to (Eq. S1) and (Eq. S2), respectively.

9 
$$CE = \frac{VmzF}{ItM_{\text{Mn}}} \times 100\% \quad (\text{Eq. S1})$$

10 
$$EC = \frac{Q_{\text{Mn}} \times U}{CE} \quad (\text{Eq. S2})$$

11 Where  $I$  is the current intensity;  $t$  is time; and  $M_{\text{Mn}}$  is the relative atomic mass of Mn,  $U$   
12 is the trough voltage;  $Q_{\text{Mn}}$  is the theoretical power consumption of manganese  
13 precipitation.

14

1 **The electrochemical impedance spectroscopy**

2 The fitting data (dots) were obtained by fitting experimental data (lines) using  
3 Armstrong equivalent circuits (Figure S2). Where the constant phase element ( $CPE_{dl}$ )  
4 replaces the capacitive element ( $C_{dl}$ ) in the fitting process,  $R_s$  represents the sum of  
5 electrode internal resistance and electrolyte resistance,  $C_{dl}$  represents the double-layer  
6 capacitor,  $R_1$  represents the desorption resistance of  $H_{ads}$ ,  $R_2$ , and  $CPE_{dl}$  represent the  
7 adsorption resistance and the corresponding capacitance, and the resistance of the  
8 constant phase element is calculated by Eq. S3.

$$Z_{CPE} = \frac{1}{Q(j\omega)^n} \quad (\text{Eq. S3})$$

9  
10  $Q$  is the double-layer capacitor;  $j$  is the arithmetic square root of -1;  $\omega$  is the angular  
11 frequency,  $n$  characterizes the deviation between the electrode surface and the ideal  
12 parallel double layer.

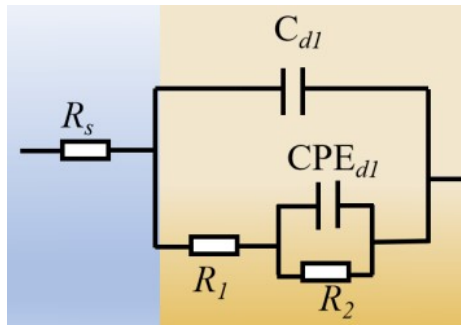

13  
14 **Figure S1** Diagram of Armstrong equivalent circuit  
15

## 1 **The activation energy**

2 Figure S5 shows the linear sweep voltammetry (LSV) curves of HER at 25 °C, 30 °C,  
3 35 °C, 40 °C, and 45 °C, it can be seen that the current increases with the increase of  
4 temperature during the electrolysis process, in this work, the apparent activation energy  
5 of HER can obtain from the classical Arrhenius (Eq. S4) [1]:

$$6 \quad \ln(j) = \ln A + \frac{E_a}{RT} \quad (\text{Eq. S4})$$

7 Where  $R$  is the molar gas constant,  $j$  is the current density, and  $A$  and  $E_a$  are two  
8 empirical parameters, called the anterior parameter and the activation energy,  
9 respectively.

10

## 11 **The Tafel slope**

12 The Overpotential ( $\eta_{HER}$ ) of HER was corrected by fitting experimental data in equation  
13 S5, then the Tafel slope can be obtained by plotting current density ( $\log(i)$ ) vs  
14 overpotential ( $\eta_{HER}$ ).

$$15 \quad \eta_{HER} = E - iR - \left( E_{H^+/H}^\theta + \frac{2.303RT}{ZF} \log C_{H^+} \right) \quad (\text{Eq. S5})$$

16 Where  $R$  is the solution resistance between the reference electrode and the working  
17 electrode, and  $E_{H^+/H}^\theta$  and  $C_{H^+}$  are the standard electrode potential of the  $H^+/H$  electric  
18 pair and the  $H^+$  concentration of the bulk solution, respectively.

19

## 1 The density functional theory calculations

2 The adsorption energy of PDs and Gibbs free energy of HER are considered, in this  
3 study, and the possible reaction pathway of the HER (Including Volmer, Heyrovsky,  
4 and Tafel reaction pathway) in the neutral solution is as follows:

5 1) H<sub>2</sub>O

6 the alkaline Volmer reaction pathway:

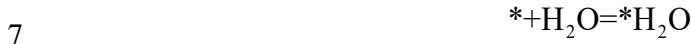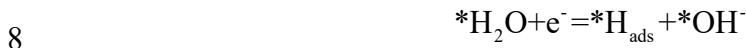

9 the alkaline Heyrovsky reaction pathway:

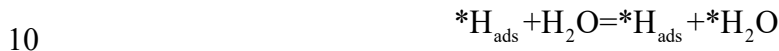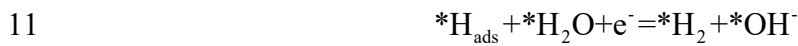

12 the alkaline Tafel reaction pathway:

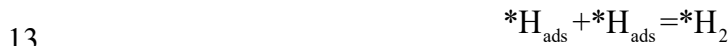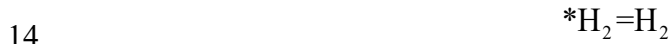

15 2) NH<sub>4</sub><sup>+</sup>

16 the alkaline Volmer reaction pathway:

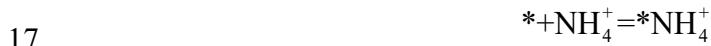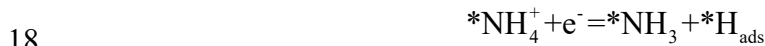

19 the alkaline Heyrovsky reaction pathway:

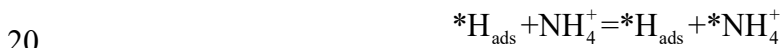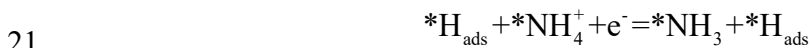

22 For the free energy calculations of each step mentioned above, a correction is applied  
23 by computing the frequencies of surface-adsorbed molecules [2, 3]. The corrected free  
24 energy is calculated as follows :

25 
$$\Delta G = \Delta E - \Delta ZPE - T\Delta S + \Delta G_U$$

26 Here,  $\Delta ZPE$  represents the zero-point vibrational energy,  $T\Delta S$  is the entropy correction,

1 and  $\Delta G_U$  is equal to  $eU$ , where  $U$  is the mentioned potential of 0 V.

2



## 1 Dynamics simulation of hydrogen evolution

2 The study has proposed that  $\text{H}_2\text{O}$  rather than  $\text{H}^+$  is the reactant of HER in an  
3 alkaline/neutral environment, which directly dissociates on the surface of the electrode  
4 [4]. However, in the presence of multiple proton donors, not only water molecules at  
5 the electrolyte interface can participate in HER, but also other proton donors (such as  
6  $\text{HPO}_4^-$ ,  $\text{NH}_4^+$ ) [5]. Therefore, with consideration of the presence of multiple proton  
7 donors ( $\text{H}_2\text{O}$ ,  $\text{NH}_4^+$ ), a microkinetic model for HER in a neutral environment was  
8 constructed as shown in Tables S3~S6, which list the elementary reaction steps and the  
9 enrolled reaction rate equations of HER in a neutral electrolyte. where  $r$  is the  
10 elementary reaction rate [ $\text{mol}\cdot\text{m}^{-2}\cdot\text{s}^{-1}$ ],  $K$  is the reaction rate constant [ $\text{mol}\cdot\text{m}^{-2}\cdot\text{s}^{-1}$ ],  $c$  is  
11 the concentration [ $\text{mol}\cdot\text{m}^{-3}$ ],  $\alpha$  is the symmetry coefficient,  $\eta$  is the overpotential [V],  
12  $R$  is the molar gas constant [ $\text{J}\cdot\text{mol}^{-1}\cdot\text{K}^{-1}$ ],  $T$  is the temperature [K],  $\theta$  is the coverage,  $\theta$   
13 subscripts  $\text{H}_{ads}$  represent the activated of adsorbed H intermediate.

14

15

1 2. Supplementary figures

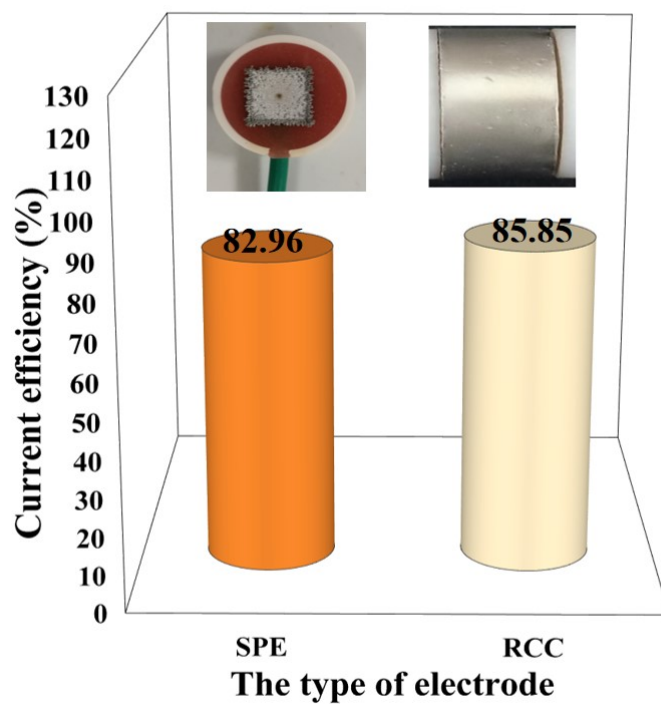

2

3

Figure S2 CE of Mn electrodeposition on SPE and RCC

4

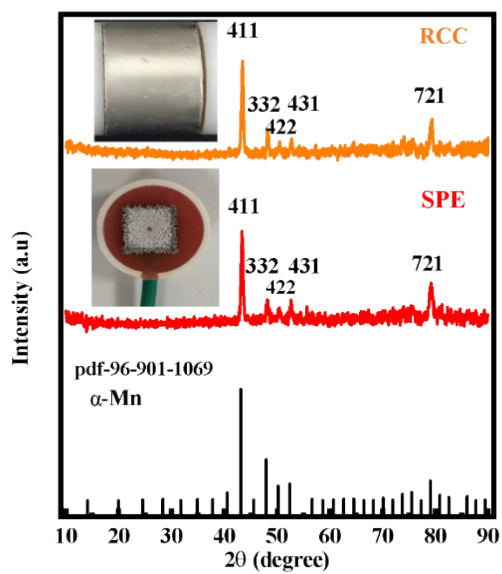

5

6

Figure S3 X-ray diffraction of SPE and RCC

7

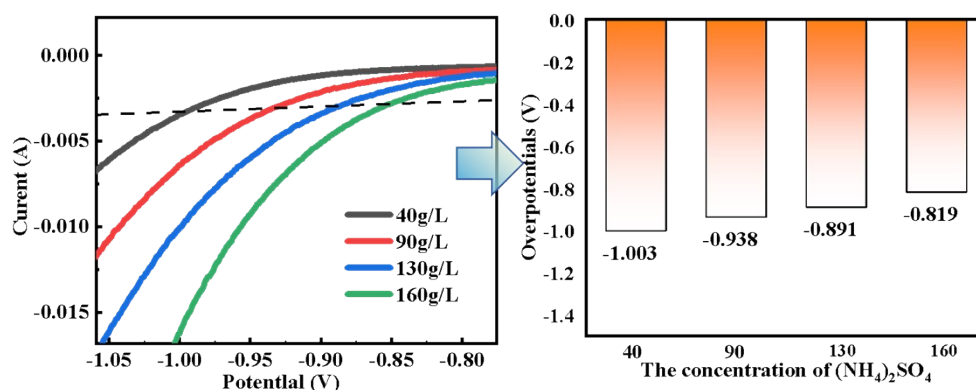

1

2 **Figure S4** LSV and corresponding overpotential of HER on RCC (1000 rpm, 30 °C)

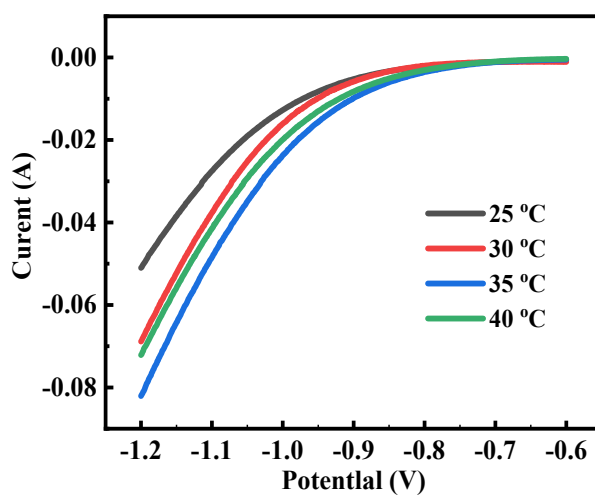

3

4 **Figure S5** LSV curves of HER on RCC (130 g/L  $(\text{NH}_4)_2\text{SO}_4$ , 1000 rpm)

5

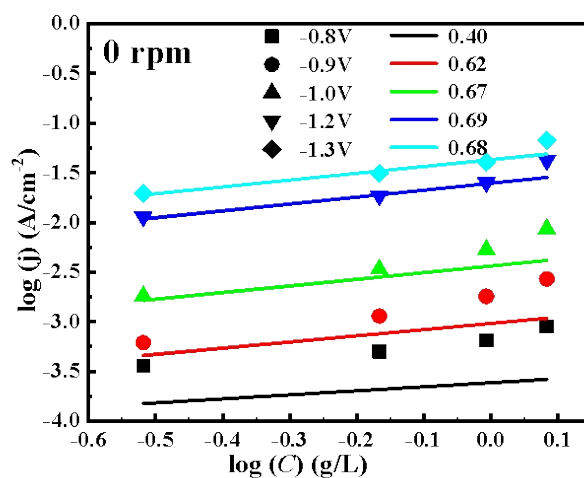

6

7

**Figure S6** Order of reaction on RCC at -0.8~-1.3 V potential (0 rpm)

8

1

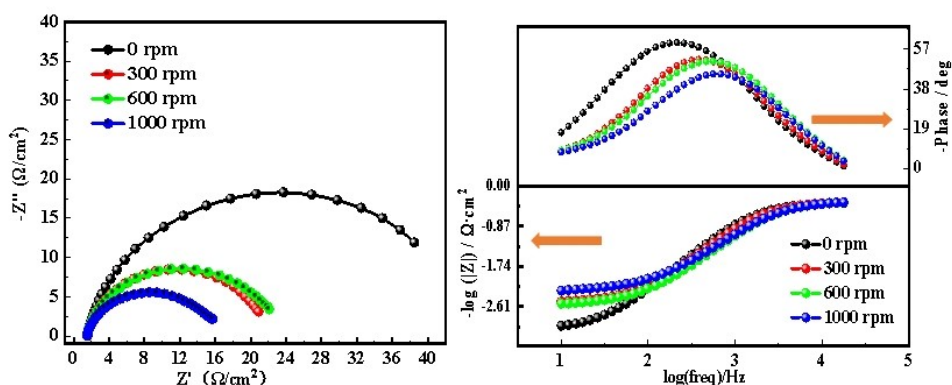

2

3

Figure S7 EIS of HER on RCC (130 g/L (NH<sub>4</sub>)<sub>2</sub>SO<sub>4</sub>, 30 °C)

4

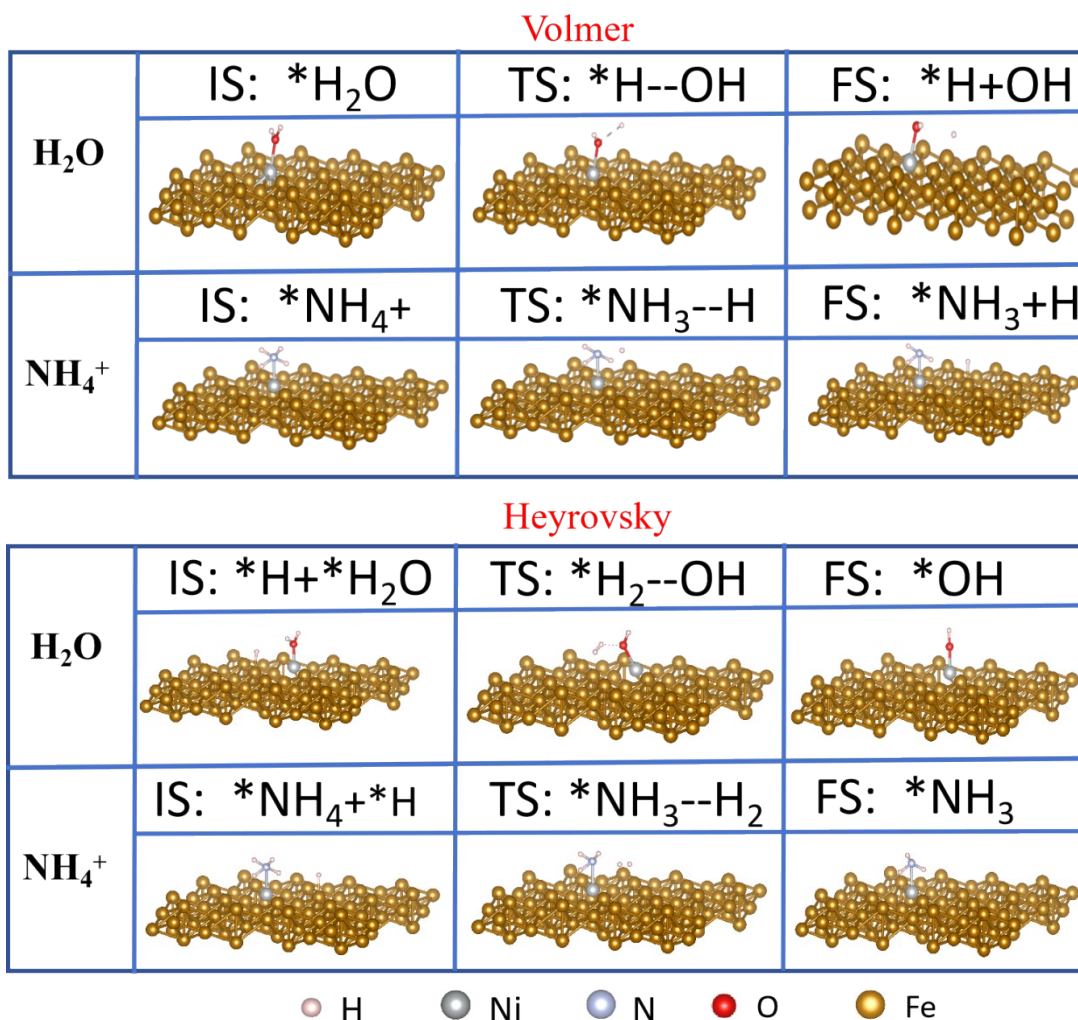

5

6

Figure S8 Minimum energy path (MEP) of the Volmer and Heyrovsky reaction of

7

H<sub>2</sub>O and NH<sub>4</sub><sup>+</sup>

1

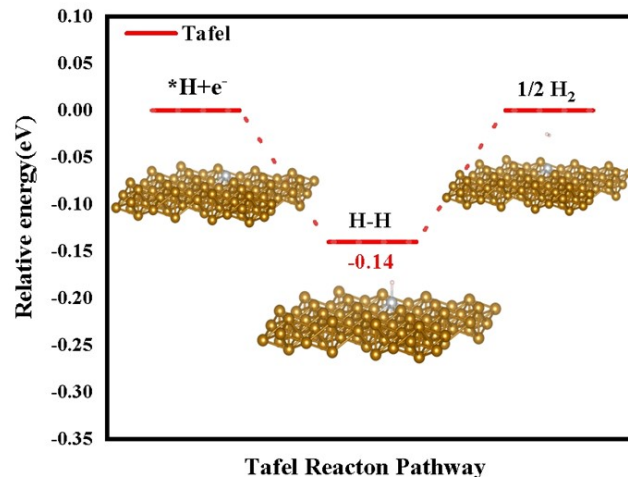

2

Figure S9 Relative energy along the Tafel reaction pathway

3

4

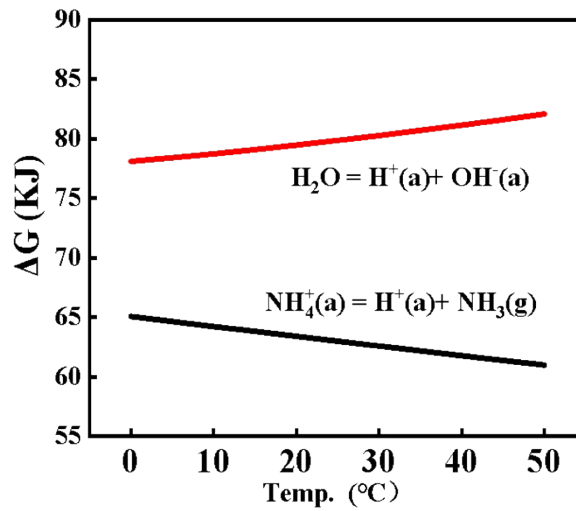

5

6

Figure S10 Gibbs free energy of the reaction  $\text{H}_2\text{O}$  and  $\text{NH}_4^+$

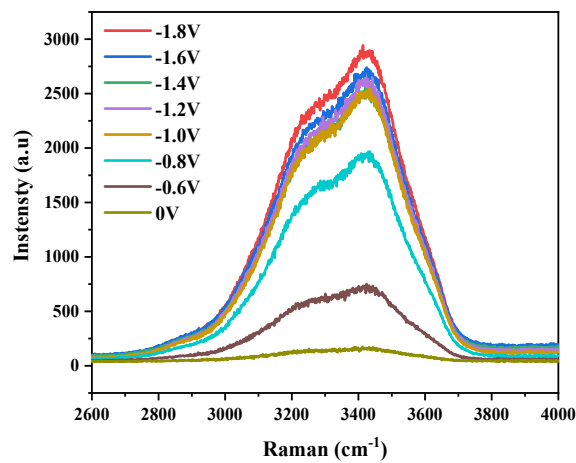

7

8

Figure S11 In-situ Raman tests of HER in the  $\text{H}_2\text{O}-130\text{g/L}(\text{NH}_4)_2\text{SO}_4$  at -0.2~-1.8V

1

potentials

2

1

2 **3. Supplementary tables**

3 **Table S1** The fitting Tafel constants of HER on RCC corresponding to Figure 2b

|          | C(NH <sub>4</sub> ) <sub>2</sub> SO <sub>4</sub> | a    | b    | β    | log( <i>i</i> <sub>0</sub> ) |
|----------|--------------------------------------------------|------|------|------|------------------------------|
| 30°C     | 40 (g/L)                                         | 2.64 | 0.63 | 0.09 | -4.01                        |
|          | 90 (g/L)                                         | 1.72 | 0.41 | 0.15 | -4.22                        |
| 1000 rpm | 130 (g/L)                                        | 1.18 | 0.25 | 0.24 | -4.66                        |
|          | 160 (g/L)                                        | 1.16 | 0.25 | 0.23 | -4.51                        |

4

5 **Table S2** The EIS of HER on RCC corresponding to Figure 2d

| Concentration<br>(g/L) | R <sub>s</sub><br>(Ω/cm <sup>2</sup> ) | C <sub>d1</sub><br>(μF/cm <sup>2</sup> ) | R <sub>1</sub><br>(Ω/cm <sup>2</sup> ) | CPE <sub>d1</sub><br>(μF/cm <sup>2</sup> ) | n<br>/ | R <sub>2</sub><br>(Ω/cm <sup>2</sup> ) |
|------------------------|----------------------------------------|------------------------------------------|----------------------------------------|--------------------------------------------|--------|----------------------------------------|
| 40                     | 7.11                                   | 26.27                                    | 21.70                                  | 42.43                                      | 0.89   | 158.10                                 |
| 90                     | 4.25                                   | 16.04                                    | 15.52                                  | 61.62                                      | 0.90   | 61.15                                  |
| 130                    | 3.44                                   | 33.96                                    | 15.14                                  | 61.24                                      | 0.94   | 26.22                                  |
| 160                    | 2.19                                   | 43.61                                    | 12.23                                  | 225.9                                      | 0.96   | 5.16                                   |

6

7

1

2 **Table S3** The elementary reaction steps of HER with VHT on RCC

| VHT                                          | H <sub>2</sub> O and NH <sub>4</sub> <sup>+</sup> are the main proton donor |                                                                                                                                                                       |
|----------------------------------------------|-----------------------------------------------------------------------------|-----------------------------------------------------------------------------------------------------------------------------------------------------------------------|
|                                              | V:                                                                          | $\frac{1}{2}NH_4^+ + \frac{1}{2}H_2O + e^- M \cdot H_{ads} + \frac{1}{2}OH^- + \frac{1}{2}NH_3 \xrightarrow[k_{-1}]{k_1} \dagger$ (Eq. S6)                            |
| Reaction steps                               | H:                                                                          | $H_{ads} + \frac{1}{2}H_2O + \frac{1}{2}H^+ + e^- H_2 + \frac{1}{2}OH^- \xrightarrow[k_{-2}]{k_2} \dagger$ (Eq. S7)                                                   |
|                                              | T:                                                                          | $2M \cdot H_{ads} H_2 \xrightarrow[k_{-3}]{k_3} \dagger$ (Eq. S8)                                                                                                     |
|                                              |                                                                             | $r_1 = k_1 \cdot (1 - \theta_{H_{ads}}) \cdot \left(\frac{C_{NH_4^+}}{C^\ominus}\right)^{1/2} \cdot \exp\left(\frac{\alpha_1 F \eta}{RT}\right)$ (Eq. S9)             |
| Reaction rate                                |                                                                             | $r_{-1} = k_{-1} \cdot \theta_{H_{ads}} \cdot \left(\frac{C_{OH^+}}{C^\ominus}\right)^{1/2} \cdot \exp\left(-\frac{(1 - \alpha_1) F \eta}{RT}\right)$ (Eq. S10)       |
| (                                            |                                                                             | $r_2 = k_2 \cdot \theta_{H_{ads}} \cdot \left(\frac{C_{H^+}}{C^\ominus}\right)^{1/2} \cdot \exp\left(\frac{\alpha_2 F \eta}{RT}\right)$ (Eq. S11)                     |
| <i>mol · m<sup>-2</sup> · s<sup>-1</sup></i> |                                                                             | $r_{-2} = k_{-2} \cdot (1 - \theta_{H_{ads}}) \cdot \left(\frac{C_{OH^+}}{C^\ominus}\right)^{1/2} \cdot \exp\left(-\frac{(1 - \alpha_2) F \eta}{RT}\right)$ (Eq. S12) |
| )                                            |                                                                             | $r_3 = k_3 \theta_{H_{ads}}^2$ (Eq. S13)                                                                                                                              |
|                                              |                                                                             | $r_{-3} = k_{-3} (1 - \theta_{H_{ads}}^2)$ (Eq. S14)                                                                                                                  |
| Reaction rate                                |                                                                             | $C_{H_{ads}} \frac{d\theta_{H_{ads}}}{dt} = r_1 - r_{-1} - r_2 + r_{-2} - r_3 + r_{-3}$ (Eq. S15)                                                                     |
| equations                                    |                                                                             | $C \frac{dE}{dt} = j(t) - \frac{(r_1 - r_{-1} + r_2 - r_{-2})F}{n}$ (Eq. S16)                                                                                         |

3

4



1 **Table S4** The elementary reaction steps of HER with VH on RCC

|                                     |                                                                                                                                                                 |           |
|-------------------------------------|-----------------------------------------------------------------------------------------------------------------------------------------------------------------|-----------|
| VH                                  | $H_2O$ and $NH_4^+$ are the main proton donor                                                                                                                   | (Eq. S17) |
| Reaction                            | $V: \frac{1}{2}NH_4^+ + \frac{1}{2}H_2O + e^- M \cdot H_{ads} + \frac{1}{2}OH^- + \frac{1}{2}NH_3$                                                              | (Eq. S18) |
| steps                               | $H: M \cdot H_{ads} + \frac{1}{2}H_2O + \frac{1}{2}H^+ + e^- H_2 + \frac{1}{2}OH^- \xrightarrow{k_2}$                                                           | (Eq. S19) |
| Reaction rate                       | $r_1 = k_1 \cdot (1 - \theta_{H_{ads}}) \cdot \left( \frac{C_{NH_4^+}}{C^\ominus} \right)^{1/2} \cdot \exp\left( \frac{\alpha_1 F \eta}{RT} \right)$            | (Eq. S20) |
| ( $mol \cdot m^{-2} \cdot s^{-1}$ ) | $r_{-1} = k_{-1} \cdot \theta_{H_{ads}} \cdot \left( \frac{C_{OH^+}}{C^\ominus} \right)^{1/2} \cdot \exp\left( -\frac{(1 - \alpha_1) F \eta}{RT} \right)$       | (Eq. S21) |
| )                                   | $r_2 = k_2 \cdot \theta_{H_{ads}} \cdot \left( \frac{C_{H^+}}{C^\ominus} \right)^{1/2} \cdot \exp\left( \frac{\alpha_2 F \eta}{RT} \right)$                     | (Eq. S22) |
|                                     | $r_{-2} = k_{-2} \cdot (1 - \theta_{H_{ads}}) \cdot \left( \frac{C_{OH^+}}{C^\ominus} \right)^{1/2} \cdot \exp\left( -\frac{(1 - \alpha_2) F \eta}{RT} \right)$ | (Eq. S23) |
| Reaction rate equations             | $C_{H_{ads}} \frac{d\theta_{H_{ads}}}{dt} = r_1 - r_{-1} - r_2 + r_{-2}$                                                                                        | (Eq. S24) |
|                                     | $C \frac{dE}{dt} = j(t) - \frac{(r_1 - r_{-1} + r_2 - r_{-2})F}{n}$                                                                                             | (Eq. S25) |

2

3

1 **Table S5** The elementary reaction steps of HER with VT on RCC

|                                   |                                                                                                                                                          |           |
|-----------------------------------|----------------------------------------------------------------------------------------------------------------------------------------------------------|-----------|
| VT                                | $H_2O$ and $NH_4^+$ are the main proton donor                                                                                                            | (Eq. S26) |
|                                   | $V: \frac{1}{2}NH_4^+ + \frac{1}{2}H_2O + e^- \cdot M \cdot H_{ads} + \frac{1}{2}OH^- + \frac{1}{2}NH_3 \xrightleftharpoons[k_{-1}]{k_1} \dagger$        | (Eq. S27) |
| Reaction steps                    | $T: M \cdot H_{ads} \xrightleftharpoons[k_{-2}]{k_2} \frac{1}{2}H_2 \dagger$                                                                             | (Eq. S28) |
| Reaction rate                     | $r_1 = k_1 \cdot (1 - \theta_{H_{ads}}) \cdot \left( \frac{C_{NH_4^+}}{C^\theta} \right)^{1/2} \cdot \exp\left( \frac{\alpha_1 F \eta}{RT} \right)$      | (Eq. S29) |
| $(mol \cdot m^{-2} \cdot s^{-1})$ | $r_{-1} = k_{-1} \cdot \theta_{H_{ads}} \cdot \left( \frac{C_{OH^+}}{C^\theta} \right)^{1/2} \cdot \exp\left( -\frac{(1 - \alpha_1) F \eta}{RT} \right)$ | (Eq. S30) |
| )                                 | $r_2 = k_2 \theta_{H_{ads}}^2$                                                                                                                           | (Eq. S31) |
|                                   | $r_{-2} = k_{-2} (1 - \theta_{H_{ads}})^2$                                                                                                               | (Eq. S32) |
| Reaction rate equation            | $C_{H_{ads}} \frac{d\theta_{H_{ads}}}{dt} = r_1 - r_{-1} - r_2 + r_{-2}$                                                                                 | (Eq. S33) |
|                                   | $C \frac{dE}{dt} = j(t) - \frac{(r_1 - r_{-1})F}{n}$                                                                                                     | (Eq. S34) |

2

3 There,  $r$  is the elementary reaction rate [ $mol \cdot m^{-2} \cdot s^{-1}$ ];  $K$  is the reaction rate constant  
4 [ $mol \cdot m^{-2} \cdot s^{-1}$ ];  $C$  is the concentration [ $mol \cdot m^{-3}$ ];  $\theta$  is the coverage;  $\alpha$  is the symmetry  
5 coefficient;  $\eta$  is the overpotential [V];  $R$  is the gas constant, 8.314 [ $J \cdot mol^{-1} \cdot K^{-1}$ ];  $T$  is  
6 the temperature [K].

7

1 **Tabel S6** The rate constants of HER on RCC corresponding to **Figure 5**

| model | speed<br>(rpm) | $k_1$                 | $k_{-1}$              | $k_2$  | $k_{-2}$               | $k_3$ | $\theta_{\text{Hads}}$ | $R^2$  |
|-------|----------------|-----------------------|-----------------------|--------|------------------------|-------|------------------------|--------|
| VHT   | 0              | $5.81 \times 10^{-6}$ | $2.22 \times 10^{-9}$ | 0.5005 | $4.52 \times 10^{-7}$  | 0.007 | 0.57                   | 0.9999 |
|       | 1000           | $7.96 \times 10^{-2}$ | $8.77 \times 10^{-9}$ | 0.9576 | $1.66 \times 10^{-10}$ | 1.098 | 0.29                   | 0.9877 |
| VH    | 0              | $1.48 \times 10^{-4}$ | $2.08 \times 10^{-5}$ | 0.9630 | $1.13 \times 10^{-6}$  |       | $5.90 \times 10^{-3}$  | 0.9811 |
|       | 1000           | $9.41 \times 10^{-1}$ | $0.24 \times 10^{-6}$ | 0.9938 | $3.26 \times 10^{-8}$  |       | $1.06 \times 10^{-5}$  | 0.9999 |
| VT    | 0              | 0.63                  | $9.14 \times 10^{-3}$ | 0.8990 | $0.59 \times 10^{-6}$  |       | $1.27 \times 10^{-7}$  | 0.9824 |
|       | 1000           | 0.69                  | $1.78 \times 10^{-8}$ | 0.9117 | $0.73 \times 10^{-6}$  |       | $6.26 \times 10^{-9}$  | 0.9879 |

2

1

## 2 4. Supplementary References

- 3 [1] R. Crețu, A. Kellenberger, N. Vaszilcsin, Enhancement of hydrogen evolution reaction on platinum  
4 cathode by proton carriers[J], *International Journal of Hydrogen Energy* 2013, 38(27), 11685-11694.
- 5 [2] Kresse, G.; Joubert, D. From ultrasoft pseudopotentials to the projector augmented-  
6 wave method[J]. *Physical Review B* 1999, 59, 1758-177.
- 7 [3] Perdew, J. P.; Burke, K.; Ernzerhof, M. Generalized gradient approximation made  
8 simple[J]. *Physical Review Letters* 1996, 77, 3865-3868.
- 9 [4] Subbaraman, R., et al. Enhancing hydrogen evolution activity in water splitting by  
10 tailoring  $\text{Li}^+$ -Ni(OH)<sub>2</sub>-Pt interfaces[J]. *Science* 2011, 334, 1256-1260.
- 11 [5] Jackson M N , Jung O , Lamotte H C ,et al. Donor-Dependent Promotion of  
12 Interfacial Proton-Coupled Electron Transfer in Aqueous Electrocatalysis[J]. *ACS*  
13 *Catalysis*, 2019, 9(4).
